# Supplementary material for: Multivariate HPLC system assessment and optimization for traditional Chinese medicine: a case study of Gastrodia elata
Source: Royal Society of Chemistry journal article supplement (doi:10.1039/d4ay01451k), 2024-01-01
Supplement: d4ay01451k1.pdf [file d4ay01451k1.pdf]

---

## **Multivariate HPLC System Assessment and Optimization for Traditional Chinese Medicine: A Case Study of *Gastrodia Elata***

**Qilin Xu, Linlin Wu\*, Xinyi Huo, Xianggang Yin, XiaoHan Zhao, Meixu Chen, Yifeng Zhou\***

<sup>a</sup>School of Biological and Chemical Engineering, Zhejiang University of Science and Technology, Hangzhou 310023, China

\*Corresponding author.

*E-mail addresses:* wull815@zust.edu.cn.

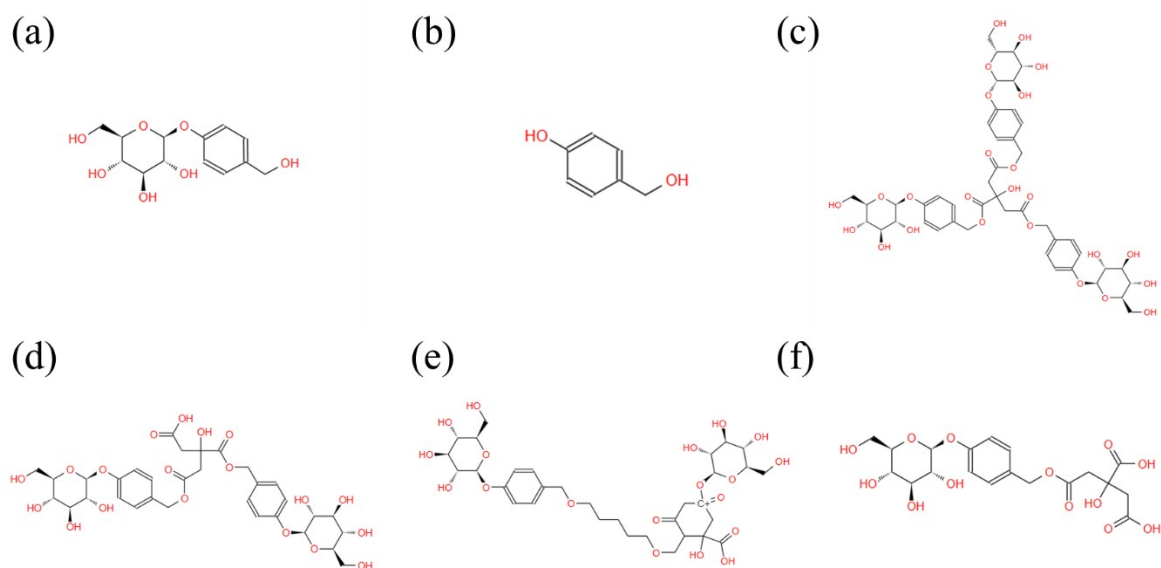

Figure S1 Chemical structures of the standards used: (a) Gastrodin; (b) *p*-Hydroxybenzyl alcohol; (c) Parisin A; (d) Parisin B; (e) Parisin C; (f) Parisin E.

Table S1 HPLC gradient elution program for the analysis of *Gastrodia elata*.

| Time (min) | Solvent A (%) | Solvent B (%) |
|------------|---------------|---------------|
| 0          | 3             | 97            |
| 10         | 3             | 97            |
| 15         | 12            | 88            |
| 25         | 18            | 82            |
| 40         | 18            | 82            |
| 41         | 95            | 5             |
| 46         | 95            | 5             |
| 47         | 3             | 97            |

Table S2 The sequence and number of injections of the reference and sample solutions for analyst A/B.

| No. | Injected solution | No. of injections | Injected solution | No. of injections |
|-----|-------------------|-------------------|-------------------|-------------------|
| 1   | RefA1             | 1                 | RefB1             | 1                 |
| 2   | RefA2             | 1                 | RefB2             | 1                 |
| 3   | RefA3             | 1                 | RefB3             | 1                 |
| 4   | RefA4             | 1                 | RefB4             | 1                 |
| 5   | RefA5             | 1                 | RefB5             | 1                 |
| 6   | SampA52           | 3                 | SampB52           | 3                 |
| 7   | SampA42           | 3                 | SampB42           | 3                 |
| 8   | SampA31           | 3                 | SampB31           | 3                 |
| 9   | SampA43           | 3                 | SampB43           | 3                 |
| 10  | SampA33           | 3                 | SampB33           | 3                 |
| 11  | RefA1             | 1                 | RefB1             | 1                 |
| 12  | RefA2             | 1                 | RefB2             | 1                 |
| 13  | RefA3             | 1                 | RefB3             | 1                 |
| 14  | RefA4             | 1                 | RefB4             | 1                 |

## Supplementary Material

|    |         |   |         |   |
|----|---------|---|---------|---|
| 15 | RefA5   | 1 | RefB5   | 1 |
| 16 | SampA41 | 3 | SampB41 | 3 |
| 17 | SampA22 | 3 | SampB22 | 3 |
| 18 | SampA13 | 3 | SampB13 | 3 |
| 19 | SampA21 | 3 | SampB21 | 3 |
| 20 | SampA53 | 3 | SampB53 | 3 |
| 21 | RefA1   | 1 | RefB1   | 1 |
| 22 | RefA2   | 1 | RefB2   | 1 |
| 23 | RefA3   | 1 | RefB3   | 1 |
| 24 | RefA4   | 1 | RefB4   | 1 |
| 25 | RefA5   | 1 | RefB5   | 1 |
| 26 | SampA51 | 3 | SampB51 | 3 |
| 27 | SampA23 | 3 | SampB23 | 3 |
| 28 | SampA32 | 3 | SampB32 | 3 |
| 29 | SampA11 | 3 | SampB11 | 3 |
| 30 | SampA12 | 3 | SampB12 | 3 |
| 31 | RefA1   | 1 | RefB1   | 1 |
| 32 | RefA2   | 1 | RefB2   | 1 |
| 33 | RefA3   | 1 | RefB3   | 1 |
| 34 | RefA4   | 1 | RefB4   | 1 |
| 35 | RefA5   | 1 | RefB5   | 1 |

Samp A<sub>ij</sub> denotes a sample sequence from analyst A, corresponding to batch i, preparation j, while Samp B<sub>ij</sub> refers to a sample sequence from analyst B, associated with batch i, preparation j. Ref A/B 1 ~ 5 represents the reference standard solution at five concentration levels.

Table S3 Normalized data of content of chemical components under the condition (1) and (9) (Standard order) of the full factorial experiment.

| Analyst | Sample No. | Sample solution | Gastrodin | <i>p</i> -hydroxybenzyl alcohol | Parishin E | Parishin B | Parishin C | Parishin A |
|---------|------------|-----------------|-----------|---------------------------------|------------|------------|------------|------------|
| A       | 1          | 1               | 0.3596    | -0.9103                         | 0.2923     | -0.6610    | 1.603      | -0.5631    |
| A       | 1          | 2               | 0.3079    | -0.9285                         | 0.2594     | -0.6662    | 1.486      | -0.5784    |
| A       | 1          | 3               | -0.0648   | -1.668                          | 1.009      | -0.5306    | 2.004      | -0.0677    |
| A       | 2          | 1               | 1.136     | -1.043                          | -1.149     | 1.337      | 0.2212     | 2.392      |
| A       | 2          | 2               | 1.358     | -0.9901                         | -1.101     | 1.652      | 0.5587     | 2.641      |
| A       | 2          | 3               | 1.275     | 0.2067                          | -1.424     | 0.6500     | -0.5140    | 1.074      |
| A       | 3          | 1               | -1.459    | -0.2726                         | -0.0821    | -0.9789    | -0.6358    | -0.8095    |
| A       | 3          | 2               | -1.557    | 1.608                           | -0.7194    | -1.441     | -1.353     | -1.263     |
| A       | 3          | 3               | -1.877    | -0.5691                         | -0.4692    | -1.604     | -1.511     | -1.083     |
| A       | 4          | 1               | 0.4532    | -0.9116                         | 0.4838     | 0.2707     | 0.7383     | 0.5775     |
| A       | 4          | 2               | 0.5023    | -0.8963                         | 0.5037     | 0.0991     | 0.7814     | 0.5871     |
| A       | 4          | 3               | -0.0831   | -1.083                          | 0.0958     | -0.5614    | -0.3406    | 0.1120     |
| A       | 5          | 1               | -0.5417   | 1.139                           | 0.9716     | 0.8597     | -0.7539    | -0.3788    |
| A       | 5          | 2               | -0.5461   | -0.4477                         | 2.467      | 1.727      | 0.1128     | 0.4345     |
| A       | 5          | 3               | -0.5771   | -0.4469                         | 2.383      | 1.644      | 0.0618     | 0.4008     |
| B       | 1          | 1               | 0.3394    | -0.9721                         | 0.2248     | -0.6825    | 1.564      | -0.5719    |
| B       | 1          | 2               | 0.3625    | -0.9601                         | 0.2421     | -0.6413    | 1.607      | -0.5522    |
| B       | 1          | 3               | 0.3746    | -0.9456                         | 0.2447     | -0.7615    | 1.630      | -0.5433    |
| B       | 2          | 1               | 1.431     | 0.1496                          | -1.403     | 0.8486     | -0.3038    | 1.203      |
| B       | 2          | 2               | 1.563     | 0.2036                          | -1.388     | 0.9863     | -0.1577    | 1.295      |
| B       | 2          | 3               | 1.586     | 0.1995                          | -1.382     | 1.0302     | -0.1797    | 1.306      |
| B       | 3          | 1               | -1.452    | 1.719                           | -0.6781    | -1.321     | -1.223     | -1.221     |

## Supplementary Material

|   |   |   |         |        |         |         |         |         |
|---|---|---|---------|--------|---------|---------|---------|---------|
| B | 3 | 2 | -1.521  | 1.708  | -0.6817 | -1.319  | -1.214  | -1.223  |
| B | 3 | 3 | -1.405  | 1.744  | -0.6590 | -1.280  | -1.175  | -1.206  |
| B | 4 | 1 | 0.5922  | 0.3622 | -0.2885 | -0.2718 | -0.1731 | -0.2192 |
| B | 4 | 2 | 0.5553  | 0.3392 | -0.2728 | -0.3012 | -0.1983 | -0.2297 |
| B | 4 | 3 | 0.4870  | 0.2840 | -0.3310 | -0.3911 | -0.2826 | -0.2689 |
| B | 5 | 1 | -0.5316 | 1.178  | 0.9919  | 0.8591  | -0.7109 | -0.3833 |
| B | 5 | 2 | -0.5993 | 1.043  | 0.8826  | 0.6085  | -0.9180 | -0.4723 |
| B | 5 | 3 | -0.4686 | 1.161  | 0.9773  | 0.8416  | -0.7227 | -0.3884 |

Table S4 Results of Pearson correlation analysis for different components.

|                                 | Gastrodin | <i>p</i> -hydroxybenzyl alcohol | Parishin E | Parishin B | Parishin C |
|---------------------------------|-----------|---------------------------------|------------|------------|------------|
| <i>p</i> -hydroxybenzyl alcohol | 0.456     | –                               | –          | –          | –          |
| Parishin E                      | 0.344     | 0.171                           | –          | –          | –          |
| Parishin B                      | 0.545     | 0.137                           | 0.216      | –          | –          |
| Parishin C                      | 0.505     | 0.798                           | 0.244      | 0.070      | –          |
| Parishin A                      | 0.786     | 0.417                           | 0.268      | 0.783      | 0.223      |

Table S5 Prioritization matrix: score for all critical variables

| NO. | Critical variables                                    | Weight (rating = 10 for each response) |     |             | Score |
|-----|-------------------------------------------------------|----------------------------------------|-----|-------------|-------|
|     |                                                       | % R&R                                  | ndc | Defect rate |       |
| 1   | Analytical chromatography method                      | 3                                      | 3   | 3           | 90    |
| 2   | Integration method                                    | 5                                      | 5   | 5           | 150   |
| 3   | Analyst experience                                    | 5                                      | 5   | 5           | 150   |
| 4   | Technique of weighing                                 | 7                                      | 7   | 7           | 210   |
| 5   | Technique of integration                              | 5                                      | 5   | 5           | 150   |
| 6   | Sample injection device                               | 3                                      | 3   | 3           | 90    |
| 7   | Detector                                              | 5                                      | 5   | 5           | 150   |
| 8   | Chromatographic column                                | 5                                      | 5   | 5           | 150   |
| 9   | Pump module                                           | 5                                      | 5   | 5           | 150   |
| 10  | Column temperature box                                | 5                                      | 5   | 5           | 150   |
| 11  | Number of concentration levels of reference substance | 9                                      | 9   | 9           | 270   |
| 12  | Weight of the control substance                       | 7                                      | 7   | 7           | 210   |
| 13  | Selection method of reference substance               | 9                                      | 9   | 9           | 270   |
| 14  | The number of injections was repeated                 | 9                                      | 9   | 9           | 270   |
| 15  | Weight of the sample                                  | 7                                      | 7   | 7           | 210   |
| 16  | The homogeneity of the samples                        | 5                                      | 5   | 5           | 150   |
| 17  | The number of sample preparation repetitions          | 9                                      | 9   | 9           | 270   |
| 18  | Reagent                                               | 5                                      | 5   | 5           | 150   |
| 19  | Pipette of water                                      | 5                                      | 5   | 5           | 150   |
| 20  | Volumetric flask                                      | 5                                      | 5   | 5           | 150   |
| 21  | Illumination                                          | 1                                      | 1   | 1           | 30    |
| 22  | Temperature                                           | 3                                      | 3   | 3           | 90    |
| 23  | Humidity                                              | 3                                      | 3   | 3           | 90    |

## Supplementary Material

Table S6 Risk priority number for the critical variables.

| No. | Critical variables                                    | Severity | Occurrence | Detection | Risk priority number |
|-----|-------------------------------------------------------|----------|------------|-----------|----------------------|
| 1   | Number of concentration levels of reference substance | 9        | 9          | 9         | 729                  |
| 2   | Selection method of reference substance               | 9        | 9          | 9         | 729                  |
| 3   | The number of injections was repeated                 | 9        | 9          | 9         | 729                  |
| 4   | The number of sample preparations                     | 9        | 9          | 9         | 729                  |
| 5   | Technique of weighing                                 | 9        | 7          | 9         | 567                  |
| 6   | Weight of the reference substance                     | 9        | 5          | 7         | 315                  |
| 7   | Weight of the sample                                  | 9        | 5          | 7         | 315                  |

## Supplementary Material

Table S7 The content of chemical components measured under various conditions (Standard order) in the full factorial experiment.

| Analyst | Sample No. | Sample solution | Component | (1)(9)<br>(mg·g <sup>-1</sup> ) | (2)(10)<br>(mg·g <sup>-1</sup> ) | (3)(11)<br>(mg·g <sup>-1</sup> ) | (4)(12)<br>(mg·g <sup>-1</sup> ) | (5)(13)<br>(mg·g <sup>-1</sup> ) | (6)(14)<br>(mg·g <sup>-1</sup> ) | (7)(15)<br>(mg·g <sup>-1</sup> ) | (8)(16)<br>(mg·g <sup>-1</sup> ) |
|---------|------------|-----------------|-----------|---------------------------------|----------------------------------|----------------------------------|----------------------------------|----------------------------------|----------------------------------|----------------------------------|----------------------------------|
| A       | 1          | 1               | Ga        | 5.519                           | 5.519                            | 5.543                            | 5.542                            | 5.505                            | 5.504                            | 5.514                            | 5.513                            |
|         |            |                 | Ph        | 0.6741                          | 0.6733                           | 0.3699                           | 0.3695                           | 0.3568                           | 0.3564                           | 0.3688                           | 0.3685                           |
|         |            |                 | PE        | 4.530                           | 4.529                            | 6.748                            | 6.747                            | 6.691                            | 6.689                            | 6.696                            | 6.695                            |
|         |            |                 | PB        | 3.294                           | 3.284                            | 3.838                            | 3.827                            | 3.779                            | 3.768                            | 3.817                            | 3.806                            |
|         |            |                 | PC        | 1.209                           | 1.208                            | 1.487                            | 1.486                            | 1.476                            | 1.475                            | 1.477                            | 1.477                            |
|         |            |                 | PA        | 5.924                           | 5.920                            | 8.402                            | 8.396                            | 8.420                            | 8.414                            | 8.356                            | 8.350                            |
| A       | 1          | 2               | Ga        | 5.452                           | 5.439                            | 5.475                            | 5.463                            | 5.437                            | 5.425                            | 5.447                            | 5.434                            |
|         |            |                 | Ph        | 0.6655                          | 0.6645                           | 0.3655                           | 0.3650                           | 0.3522                           | 0.3517                           | 0.3645                           | 0.3640                           |
|         |            |                 | PE        | 4.466                           | 4.458                            | 6.654                            | 6.642                            | 6.597                            | 6.585                            | 6.603                            | 6.591                            |
|         |            |                 | PB        | 3.290                           | 3.284                            | 3.835                            | 3.828                            | 3.775                            | 3.768                            | 3.814                            | 3.807                            |
|         |            |                 | PC        | 1.186                           | 1.185                            | 1.459                            | 1.458                            | 1.448                            | 1.447                            | 1.450                            | 1.448                            |
|         |            |                 | PA        | 5.872                           | 5.859                            | 8.328                            | 8.308                            | 8.346                            | 8.327                            | 8.283                            | 8.263                            |
| A       | 1          | 3               | Ga        | 4.963                           | 4.950                            | 4.974                            | 4.961                            | 4.976                            | 4.963                            | 4.999                            | 4.986                            |
|         |            |                 | Ph        | 0.3165                          | 0.3167                           | 0.3287                           | 0.3289                           | 0.5979                           | 0.5983                           | 0.3293                           | 0.3295                           |
|         |            |                 | PE        | 5.914                           | 5.891                            | 5.924                            | 5.901                            | 4.004                            | 3.988                            | 5.968                            | 5.945                            |
|         |            |                 | PB        | 3.391                           | 3.381                            | 3.431                            | 3.421                            | 2.955                            | 2.947                            | 3.449                            | 3.439                            |
|         |            |                 | PC        | 1.287                           | 1.283                            | 1.289                            | 1.286                            | 1.054                            | 1.051                            | 1.298                            | 1.294                            |
|         |            |                 | PA        | 7.587                           | 7.556                            | 7.526                            | 7.496                            | 5.338                            | 5.317                            | 7.566                            | 7.535                            |
| A       | 2          | 1               | Ga        | 6.537                           | 6.538                            | 6.544                            | 6.545                            | 6.554                            | 6.555                            | 6.580                            | 6.581                            |
|         |            |                 | Ph        | 0.6115                          | 0.6222                           | 0.6229                           | 0.6335                           | 1.1553                           | 1.1754                           | 0.6266                           | 0.6373                           |
|         |            |                 | PE        | 1.746                           | 1.761                            | 1.778                            | 1.793                            | 1.182                            | 1.192                            | 1.780                            | 1.796                            |
|         |            |                 | PB        | 4.789                           | 4.778                            | 4.825                            | 4.813                            | 4.174                            | 4.164                            | 4.853                            | 4.842                            |
|         |            |                 | PC        | 0.9389                          | 0.9434                           | 0.9424                           | 0.9468                           | 0.7689                           | 0.7726                           | 0.9480                           | 0.9525                           |
|         |            |                 | PA        | 15.84                           | 15.87                            | 15.75                            | 15.78                            | 11.15                            | 11.17                            | 15.85                            | 15.88                            |
| A       | 2          | 2               | Ga        | 6.827                           | 6.848                            | 6.833                            | 6.854                            | 6.845                            | 6.866                            | 6.871                            | 6.893                            |
|         |            |                 | Ph        | 0.6364                          | 0.6397                           | 0.6478                           | 0.6511                           | 1.2023                           | 1.2086                           | 0.6517                           | 0.6551                           |
|         |            |                 | PE        | 1.839                           | 1.847                            | 1.871                            | 1.879                            | 1.245                            | 1.250                            | 1.874                            | 1.882                            |

## Supplementary Material

---

|   |   |   |    |        |        |        |        |        |        |        |        |
|---|---|---|----|--------|--------|--------|--------|--------|--------|--------|--------|
| A | 2 | 3 | PB | 5.025  | 5.044  | 5.060  | 5.079  | 4.380  | 4.396  | 5.090  | 5.110  |
|   |   |   | PC | 1.005  | 1.007  | 1.008  | 1.010  | 0.823  | 0.824  | 1.014  | 1.016  |
|   |   |   | PA | 16.68  | 16.69  | 16.58  | 16.59  | 11.73  | 11.74  | 16.69  | 16.70  |
|   |   |   | Ga | 6.718  | 6.736  | 6.744  | 6.763  | 6.700  | 6.719  | 6.707  | 6.725  |
|   |   |   | Ph | 1.201  | 1.204  | 0.651  | 0.653  | 0.636  | 0.637  | 0.647  | 0.649  |
|   |   |   | PE | 1.215  | 1.219  | 1.829  | 1.835  | 1.795  | 1.800  | 1.827  | 1.832  |
|   |   |   | PB | 4.275  | 4.290  | 4.970  | 4.987  | 4.905  | 4.923  | 4.940  | 4.957  |
|   |   |   | PC | 0.7953 | 0.7975 | 0.9804 | 0.9831 | 0.9712 | 0.9739 | 0.9745 | 0.9772 |
|   |   |   | PA | 11.42  | 11.46  | 16.24  | 16.29  | 16.23  | 16.28  | 16.13  | 16.19  |
|   |   |   | Ga | 3.137  | 3.106  | 3.158  | 3.127  | 3.165  | 3.134  | 3.181  | 3.150  |
| A | 3 | 1 | Ph | 0.9752 | 0.9652 | 0.9908 | 0.9809 | 1.853  | 1.834  | 0.9963 | 0.9863 |
|   |   |   | PE | 3.807  | 3.781  | 3.838  | 3.812  | 2.601  | 2.583  | 3.875  | 3.849  |
|   |   |   | PB | 3.056  | 3.069  | 3.107  | 3.120  | 2.685  | 2.697  | 3.135  | 3.148  |
|   |   |   | PC | 0.7716 | 0.7866 | 0.7780 | 0.7929 | 0.6365 | 0.6488 | 0.7847 | 0.7998 |
|   |   |   | PA | 5.097  | 5.085  | 5.053  | 5.041  | 3.613  | 3.604  | 5.099  | 5.088  |
|   |   |   | Ga | 3.009  | 3.007  | 3.028  | 3.026  | 3.001  | 2.999  | 3.016  | 3.014  |
|   |   |   | Ph | 1.863  | 1.862  | 1.004  | 1.003  | 0.986  | 0.985  | 0.996  | 0.996  |
|   |   |   | PE | 2.576  | 2.526  | 3.849  | 3.775  | 3.804  | 3.730  | 3.826  | 3.752  |
|   |   |   | PB | 2.709  | 2.686  | 3.166  | 3.139  | 3.109  | 3.082  | 3.150  | 3.124  |
|   |   |   | PC | 0.6315 | 0.6350 | 0.7795 | 0.7838 | 0.7711 | 0.7754 | 0.7753 | 0.7795 |
| A | 3 | 2 | PA | 3.576  | 3.591  | 5.052  | 5.073  | 5.082  | 5.103  | 5.031  | 5.052  |
|   |   |   | Ga | 2.590  | 2.588  | 2.611  | 2.609  | 2.614  | 2.612  | 2.630  | 2.628  |
|   |   |   | Ph | 0.8352 | 0.8363 | 0.8511 | 0.8521 | 1.5872 | 1.5893 | 0.8552 | 0.8563 |
|   |   |   | PE | 3.059  | 3.091  | 3.091  | 3.122  | 2.090  | 2.112  | 3.121  | 3.153  |
|   |   |   | PB | 2.587  | 2.566  | 2.638  | 2.618  | 2.274  | 2.255  | 2.663  | 2.642  |
|   |   |   | PC | 0.6006 | 0.6175 | 0.6069 | 0.6238 | 0.4954 | 0.5093 | 0.6124 | 0.6294 |
|   |   |   | PA | 4.179  | 4.174  | 4.133  | 4.128  | 2.962  | 2.958  | 4.174  | 4.169  |
|   |   |   | Ga | 5.642  | 5.637  | 5.651  | 5.646  | 5.657  | 5.652  | 5.681  | 5.676  |
|   |   |   | Ph | 0.6735 | 0.6730 | 0.6847 | 0.6842 | 1.272  | 1.271  | 0.6890 | 0.6885 |
|   |   |   | PE | 4.900  | 4.894  | 4.915  | 4.910  | 3.317  | 3.314  | 4.949  | 4.944  |

## Supplementary Material

---

|   |   |   |    |        |        |        |        |        |        |        |        |
|---|---|---|----|--------|--------|--------|--------|--------|--------|--------|--------|
| A | 4 | 2 | PB | 3.991  | 3.984  | 4.029  | 4.022  | 3.478  | 3.472  | 4.052  | 4.044  |
|   |   |   | PC | 1.040  | 1.020  | 1.043  | 1.024  | 0.8516 | 0.8356 | 1.049  | 1.030  |
|   |   |   | PA | 9.752  | 9.749  | 9.683  | 9.679  | 6.862  | 6.859  | 9.738  | 9.735  |
|   |   |   | Ga | 5.706  | 5.727  | 5.731  | 5.752  | 5.758  | 5.778  | 5.772  | 5.792  |
|   |   |   | Ph | 0.6807 | 0.6087 | 0.6967 | 0.6248 | 1.294  | 1.157  | 0.6993 | 0.6267 |
|   |   |   | PE | 4.938  | 4.949  | 4.970  | 4.981  | 3.374  | 3.382  | 5.017  | 5.029  |
|   |   |   | PB | 3.863  | 3.888  | 3.913  | 3.939  | 3.394  | 3.417  | 3.948  | 3.974  |
|   |   |   | PC | 1.048  | 1.033  | 1.055  | 1.039  | 0.8648 | 0.8520 | 1.064  | 1.048  |
|   |   |   | PA | 9.785  | 9.778  | 9.747  | 9.740  | 6.935  | 6.931  | 9.825  | 9.818  |
|   |   |   | Ga | 4.939  | 4.927  | 4.963  | 4.951  | 4.984  | 4.972  | 4.998  | 4.986  |
| A | 4 | 3 | Ph | 0.5923 | 0.5911 | 0.6084 | 0.6073 | 1.126  | 1.123  | 0.6102 | 0.6090 |
|   |   |   | PE | 4.150  | 4.141  | 4.182  | 4.173  | 2.836  | 2.829  | 4.222  | 4.213  |
|   |   |   | PB | 3.368  | 3.360  | 3.419  | 3.410  | 2.960  | 2.952  | 3.449  | 3.441  |
|   |   |   | PC | 0.8292 | 0.8270 | 0.8356 | 0.8333 | 0.6840 | 0.6822 | 0.8427 | 0.8405 |
|   |   |   | PA | 8.190  | 8.171  | 8.150  | 8.131  | 5.805  | 5.791  | 8.217  | 8.198  |
|   |   |   | Ga | 4.339  | 4.343  | 4.360  | 4.364  | 4.327  | 4.331  | 4.339  | 4.343  |
|   |   |   | Ph | 1.642  | 1.641  | 0.8860 | 0.8857 | 0.8690 | 0.8687 | 0.8796 | 0.8793 |
|   |   |   | PE | 5.842  | 5.841  | 8.696  | 8.695  | 8.629  | 8.628  | 8.624  | 8.623  |
|   |   |   | PB | 4.432  | 4.428  | 5.150  | 5.146  | 5.086  | 5.081  | 5.120  | 5.115  |
|   |   |   | PC | 0.7485 | 0.7489 | 0.9230 | 0.9235 | 0.9140 | 0.9145 | 0.9176 | 0.9180 |
| A | 5 | 1 | PA | 6.543  | 6.544  | 9.284  | 9.285  | 9.299  | 9.301  | 9.232  | 9.233  |
|   |   |   | Ga | 4.333  | 4.354  | 4.356  | 4.377  | 4.372  | 4.393  | 4.387  | 4.408  |
|   |   |   | Ph | 0.8925 | 0.9041 | 0.9083 | 0.9199 | 1.696  | 1.718  | 0.9130 | 0.9247 |
|   |   |   | PE | 8.730  | 8.699  | 8.761  | 8.730  | 5.965  | 5.943  | 8.844  | 8.813  |
|   |   |   | PB | 5.081  | 5.070  | 5.132  | 5.121  | 4.465  | 4.456  | 5.176  | 5.165  |
|   |   |   | PC | 0.9178 | 0.9192 | 0.9242 | 0.9256 | 0.7571 | 0.7583 | 0.9320 | 0.9335 |
|   |   |   | PA | 9.272  | 9.281  | 9.234  | 9.243  | 6.572  | 6.578  | 9.308  | 9.317  |
|   |   |   | Ga | 4.292  | 4.290  | 4.305  | 4.302  | 4.304  | 4.302  | 4.325  | 4.323  |
|   |   |   | Ph | 0.8929 | 0.8922 | 0.9034 | 0.9027 | 1.687  | 1.686  | 0.9101 | 0.9094 |
|   |   |   | PE | 8.568  | 8.567  | 8.564  | 8.562  | 5.801  | 5.800  | 8.635  | 8.634  |

---



## Supplementary Material

---

|   |   |   |    |        |        |        |        |        |        |        |        |
|---|---|---|----|--------|--------|--------|--------|--------|--------|--------|--------|
|   |   |   | PB | 5.019  | 5.018  | 5.054  | 5.052  | 4.374  | 4.373  | 5.084  | 5.082  |
|   |   |   | PC | 0.9078 | 0.9072 | 0.9114 | 0.9108 | 0.7434 | 0.7429 | 0.9168 | 0.9162 |
|   |   |   | PA | 9.159  | 9.162  | 9.092  | 9.095  | 6.444  | 6.446  | 9.143  | 9.146  |
|   |   |   | Ga | 5.493  | 5.488  | 5.494  | 5.490  | 5.522  | 5.517  | 5.531  | 5.526  |
|   |   |   | Ph | 0.6449 | 0.6460 | 0.3457 | 0.3462 | 0.6483 | 0.6494 | 0.3410 | 0.3416 |
| B | 1 | 1 | PE | 4.399  | 4.397  | 6.690  | 6.685  | 4.423  | 4.420  | 6.697  | 6.693  |
|   |   |   | PB | 3.277  | 3.277  | 3.807  | 3.806  | 3.295  | 3.294  | 3.807  | 3.807  |
|   |   |   | PC | 1.201  | 1.200  | 1.491  | 1.490  | 1.208  | 1.206  | 1.494  | 1.493  |
|   |   |   | PA | 5.894  | 5.892  | 8.143  | 8.139  | 5.925  | 5.923  | 8.154  | 8.150  |
|   |   |   | Ga | 5.523  | 5.520  | 5.524  | 5.522  | 5.552  | 5.549  | 5.561  | 5.558  |
|   |   |   | Ph | 0.6506 | 0.6523 | 0.3487 | 0.3496 | 0.6540 | 0.6557 | 0.3440 | 0.3450 |
| B | 1 | 2 | PE | 4.433  | 4.431  | 6.740  | 6.738  | 4.456  | 4.454  | 6.748  | 6.745  |
|   |   |   | PB | 3.308  | 3.274  | 3.842  | 3.803  | 3.326  | 3.292  | 3.843  | 3.803  |
|   |   |   | PC | 1.210  | 1.209  | 1.501  | 1.500  | 1.216  | 1.215  | 1.505  | 1.504  |
|   |   |   | PA | 5.961  | 5.955  | 8.234  | 8.227  | 5.992  | 5.987  | 8.245  | 8.238  |
|   |   |   | Ga | 5.539  | 5.497  | 5.548  | 5.506  | 5.510  | 5.468  | 5.511  | 5.469  |
|   |   |   | Ph | 0.6574 | 0.6507 | 0.3459 | 0.3423 | 0.6540 | 0.6473 | 0.3505 | 0.3470 |
| B | 1 | 3 | PE | 4.438  | 4.410  | 6.720  | 6.679  | 4.414  | 4.387  | 6.712  | 6.671  |
|   |   |   | PB | 3.218  | 3.231  | 3.719  | 3.733  | 3.201  | 3.214  | 3.719  | 3.733  |
|   |   |   | PC | 1.214  | 1.206  | 1.502  | 1.492  | 1.208  | 1.200  | 1.499  | 1.489  |
|   |   |   | PA | 5.991  | 5.944  | 8.243  | 8.180  | 5.959  | 5.913  | 8.231  | 8.169  |
|   |   |   | Ga | 6.923  | 6.938  | 6.939  | 6.954  | 6.887  | 6.902  | 6.890  | 6.905  |
|   |   |   | Ph | 1.175  | 1.177  | 0.6217 | 0.6230 | 1.168  | 1.171  | 0.6259 | 0.6272 |
| B | 2 | 1 | PE | 1.255  | 1.257  | 1.908  | 1.911  | 1.248  | 1.250  | 1.916  | 1.919  |
|   |   |   | PB | 4.424  | 4.430  | 5.111  | 5.119  | 4.401  | 4.407  | 5.104  | 5.111  |
|   |   |   | PC | 0.8364 | 0.8372 | 1.034  | 1.035  | 0.8320 | 0.8328 | 1.033  | 1.034  |
|   |   |   | PA | 11.85  | 11.87  | 16.26  | 16.30  | 11.79  | 11.81  | 16.19  | 16.22  |
|   |   |   | Ga | 7.095  | 7.055  | 7.112  | 7.072  | 7.058  | 7.018  | 7.061  | 7.021  |
| B | 2 | 2 | Ph | 1.200  | 1.196  | 0.6353 | 0.6332 | 1.194  | 1.190  | 0.6394 | 0.6373 |
|   |   |   | PE | 1.284  | 1.278  | 1.952  | 1.944  | 1.277  | 1.272  | 1.960  | 1.952  |

## Supplementary Material

---

|   |   |   |    |        |        |        |        |        |        |        |        |
|---|---|---|----|--------|--------|--------|--------|--------|--------|--------|--------|
| B | 2 | 3 | PB | 4.527  | 4.512  | 5.231  | 5.214  | 4.503  | 4.489  | 5.222  | 5.206  |
|   |   |   | PC | 0.8649 | 0.8609 | 1.070  | 1.065  | 0.8604 | 0.8564 | 1.068  | 1.063  |
|   |   |   | PA | 12.16  | 12.11  | 16.69  | 16.61  | 12.10  | 12.04  | 16.61  | 16.54  |
|   |   |   | Ga | 7.125  | 7.129  | 7.128  | 7.132  | 7.163  | 7.167  | 7.180  | 7.184  |
|   |   |   | Ph | 1.198  | 1.200  | 0.6418 | 0.6428 | 1.204  | 1.206  | 0.6376 | 0.6386 |
|   |   |   | PE | 1.295  | 1.295  | 1.988  | 1.987  | 1.302  | 1.302  | 1.980  | 1.979  |
|   |   |   | PB | 4.560  | 4.567  | 5.288  | 5.297  | 4.584  | 4.591  | 5.296  | 5.305  |
|   |   |   | PC | 0.8606 | 0.8618 | 1.069  | 1.070  | 0.8652 | 0.8663 | 1.070  | 1.071  |
|   |   |   | PA | 12.20  | 12.21  | 16.75  | 16.77  | 12.26  | 12.28  | 16.82  | 16.85  |
|   |   |   | Ga | 3.147  | 3.155  | 3.147  | 3.155  | 3.222  | 3.230  | 3.200  | 3.208  |
| B | 3 | 1 | Ph | 1.916  | 1.917  | 1.020  | 1.020  | 1.961  | 1.962  | 1.029  | 1.030  |
|   |   |   | PE | 2.655  | 2.658  | 4.031  | 4.035  | 2.718  | 2.721  | 4.091  | 4.095  |
|   |   |   | PB | 2.799  | 2.802  | 3.243  | 3.247  | 2.865  | 2.869  | 3.270  | 3.273  |
|   |   |   | PC | 0.6569 | 0.6576 | 0.8140 | 0.8149 | 0.6724 | 0.6731 | 0.8269 | 0.8279 |
|   |   |   | PA | 3.715  | 3.721  | 5.151  | 5.158  | 3.803  | 3.809  | 5.175  | 5.183  |
|   |   |   | Ga | 3.056  | 3.064  | 3.055  | 3.063  | 3.072  | 3.080  | 3.069  | 3.077  |
|   |   |   | Ph | 1.910  | 1.911  | 1.023  | 1.023  | 1.920  | 1.921  | 1.020  | 1.020  |
|   |   |   | PE | 2.648  | 2.649  | 4.037  | 4.039  | 2.662  | 2.663  | 4.036  | 4.037  |
|   |   |   | PB | 2.801  | 2.803  | 3.256  | 3.259  | 2.816  | 2.818  | 3.254  | 3.256  |
|   |   |   | PC | 0.6586 | 0.6689 | 0.8180 | 0.8308 | 0.6621 | 0.6724 | 0.8184 | 0.8312 |
| B | 3 | 2 | PA | 3.710  | 3.711  | 5.161  | 5.162  | 3.730  | 3.731  | 5.149  | 5.150  |
|   |   |   | Ga | 3.208  | 3.131  | 3.208  | 3.131  | 3.284  | 3.205  | 3.263  | 3.183  |
|   |   |   | Ph | 1.928  | 1.917  | 1.026  | 1.021  | 1.973  | 1.963  | 1.036  | 1.030  |
|   |   |   | PE | 2.692  | 2.664  | 4.087  | 4.044  | 2.756  | 2.726  | 4.149  | 4.104  |
|   |   |   | PB | 2.830  | 2.807  | 3.279  | 3.252  | 2.897  | 2.873  | 3.307  | 3.279  |
|   |   |   | PC | 0.6662 | 0.6595 | 0.8255 | 0.8173 | 0.6819 | 0.6751 | 0.8388 | 0.8303 |
|   |   |   | PA | 3.767  | 3.723  | 5.222  | 5.161  | 3.856  | 3.811  | 5.249  | 5.186  |
|   |   |   | Ga | 5.824  | 5.824  | 5.834  | 5.834  | 5.793  | 5.793  | 5.795  | 5.795  |
|   |   |   | Ph | 1.275  | 1.276  | 0.6753 | 0.6757 | 1.268  | 1.269  | 0.6793 | 0.6797 |
|   |   |   | PE | 3.408  | 3.407  | 5.163  | 5.162  | 3.390  | 3.389  | 5.161  | 5.159  |

## Supplementary Material

---

|   |   |   |    |        |        |        |        |        |        |        |        |
|---|---|---|----|--------|--------|--------|--------|--------|--------|--------|--------|
| B | 4 | 2 | PB | 3.585  | 3.587  | 4.142  | 4.145  | 3.566  | 3.568  | 4.140  | 4.143  |
|   |   |   | PC | 0.8619 | 0.8617 | 1.066  | 1.066  | 0.8574 | 0.8572 | 1.065  | 1.064  |
|   |   |   | PA | 7.078  | 7.079  | 9.732  | 9.732  | 7.041  | 7.042  | 9.709  | 9.709  |
|   |   |   | Ga | 5.776  | 5.791  | 5.776  | 5.792  | 5.912  | 5.927  | 5.924  | 5.939  |
|   |   |   | Ph | 1.264  | 1.265  | 0.6741 | 0.6746 | 1.294  | 1.295  | 0.6698 | 0.6702 |
|   |   |   | PE | 3.438  | 3.429  | 5.210  | 5.196  | 3.519  | 3.510  | 5.313  | 5.299  |
|   |   |   | PB | 3.563  | 3.572  | 4.120  | 4.131  | 3.647  | 3.656  | 4.182  | 4.193  |
|   |   |   | PC | 0.8570 | 0.8579 | 1.061  | 1.062  | 0.8772 | 0.8781 | 1.083  | 1.084  |
|   |   |   | PA | 7.043  | 7.061  | 9.682  | 9.706  | 7.209  | 7.228  | 9.876  | 9.901  |
|   |   |   | Ga | 5.686  | 5.717  | 5.687  | 5.718  | 5.820  | 5.852  | 5.831  | 5.863  |
| B | 4 | 3 | Ph | 1.238  | 1.243  | 0.6603 | 0.6629 | 1.267  | 1.272  | 0.6554 | 0.6582 |
|   |   |   | PE | 3.326  | 3.346  | 5.041  | 5.071  | 3.404  | 3.425  | 5.138  | 5.169  |
|   |   |   | PB | 3.496  | 3.516  | 4.043  | 4.066  | 3.578  | 3.599  | 4.102  | 4.126  |
|   |   |   | PC | 0.8405 | 0.8449 | 1.041  | 1.046  | 0.8604 | 0.8649 | 1.062  | 1.068  |
|   |   |   | PA | 6.911  | 6.948  | 9.502  | 9.552  | 7.074  | 7.112  | 9.690  | 9.741  |
|   |   |   | Ga | 4.352  | 4.315  | 4.352  | 4.315  | 4.375  | 4.338  | 4.378  | 4.341  |
|   |   |   | Ph | 1.660  | 1.647  | 0.8889 | 0.8819 | 1.669  | 1.655  | 0.8853 | 0.8783 |
|   |   |   | PE | 5.881  | 5.841  | 8.934  | 8.873  | 5.912  | 5.872  | 8.949  | 8.888  |
|   |   |   | PB | 4.432  | 4.400  | 5.140  | 5.103  | 4.455  | 4.423  | 5.147  | 5.111  |
|   |   |   | PC | 0.7569 | 0.7524 | 0.9399 | 0.9343 | 0.7609 | 0.7564 | 0.9409 | 0.9353 |
| B | 5 | 1 | PA | 6.527  | 6.482  | 9.007  | 8.946  | 6.562  | 6.517  | 9.025  | 8.963  |
|   |   |   | Ga | 4.263  | 4.298  | 4.264  | 4.299  | 4.364  | 4.400  | 4.357  | 4.393  |
|   |   |   | Ph | 1.596  | 1.611  | 0.8502 | 0.8581 | 1.634  | 1.649  | 0.8530 | 0.8612 |
|   |   |   | PE | 5.670  | 5.684  | 8.572  | 8.592  | 5.804  | 5.818  | 8.796  | 8.817  |
|   |   |   | PB | 4.244  | 4.269  | 4.903  | 4.932  | 4.344  | 4.370  | 4.995  | 5.025  |
|   |   |   | PC | 0.7165 | 0.7214 | 0.8876 | 0.8936 | 0.7334 | 0.7384 | 0.9033 | 0.9095 |
|   |   |   | PA | 6.229  | 6.268  | 8.573  | 8.626  | 6.376  | 6.416  | 8.726  | 8.781  |
|   |   |   | Ga | 4.435  | 4.342  | 4.438  | 4.345  | 4.411  | 4.319  | 4.412  | 4.319  |
|   |   |   | Ph | 1.652  | 1.639  | 0.8765 | 0.8695 | 1.644  | 1.630  | 0.8802 | 0.8732 |
|   |   |   | PE | 5.853  | 5.819  | 8.860  | 8.809  | 5.822  | 5.789  | 8.845  | 8.794  |

---

Supplementary Material

---

|    |        |        |        |        |        |        |        |        |
|----|--------|--------|--------|--------|--------|--------|--------|--------|
| PB | 4.419  | 4.390  | 5.105  | 5.072  | 4.395  | 4.367  | 5.098  | 5.065  |
| PC | 0.7546 | 0.7487 | 0.9330 | 0.9258 | 0.7506 | 0.7448 | 0.9321 | 0.9249 |
| PA | 6.510  | 6.466  | 8.954  | 8.894  | 6.476  | 6.432  | 8.937  | 8.877  |

---

<sup>a</sup> Ga, Gastrodin; Ph; *p*-hydroxybenzyl alcohol; PE, Parishin E; PB, Parishin B; PC, Parishin C; PA, Parishin A.

Table S8 Results for calculations of % R&R and ndc indexes by ANOVA and Xbar-R method at the conditions of the full factorial designed experiment

| Index | Method | (1)   | (2)   | (3)   | (4)  | (5)   | (6)   | (7)  | (8)   |
|-------|--------|-------|-------|-------|------|-------|-------|------|-------|
|       |        | (9)   | (10)  | (11)  | (12) | (13)  | (14)  | (15) | (16)  |
| %R&R  | ANOVA  | 26.43 | 26.59 | 17.87 | 8.75 | 29.95 | 29.57 | 8.73 | 17.85 |
|       | Xbar-R | 20.64 | 20.36 | 14.01 | 6.87 | 21.92 | 21.44 | 7.25 | 13.80 |
| ndc   | ANOVA  | 5     | 5     | 7     | 16   | 4     | 4     | 16   | 7     |
|       | Xbar-R | 7     | 7     | 10    | 20   | 6     | 6     | 19   | 10    |

Table S9 Results of weighted principal component analysis for six CTQs under conditions (1) and (9) (Standard order) from the full factorial experiment

| Sample No. | Analyst A       |                 |                 | Analyst B       |                 |                 |
|------------|-----------------|-----------------|-----------------|-----------------|-----------------|-----------------|
|            | 1 <sup>st</sup> | 2 <sup>nd</sup> | 3 <sup>rd</sup> | 1 <sup>st</sup> | 2 <sup>nd</sup> | 3 <sup>rd</sup> |
| 1          | -1.761          | -1.906          | -1.187          | -1.854          | -1.677          | -1.910          |
| 2          | 10.18           | 11.84           | 6.003           | 7.026           | 7.774           | 7.931           |
| 3          | -6.473          | -8.757          | -9.245          | -8.207          | -8.322          | -7.997          |
| 4          | 2.675           | 2.389           | -1.207          | -0.0561         | -0.2138         | -0.6178         |
| 5          | -0.0968         | 3.533           | 3.227           | -0.0886         | -0.9683         | -0.0293         |

1<sup>st</sup>: first sample preparations; 2<sup>nd</sup>: second sample preparations; 3<sup>rd</sup>: third sample preparations.

Table S10 ANOVA for the Box-Behnken design experiment.

| Response                    | Source <sup>a</sup>           | Sum of squares | Freedom | Mean Square | F-value |
|-----------------------------|-------------------------------|----------------|---------|-------------|---------|
| Y <sub>1</sub> <sup>b</sup> | Model                         | 316.7          | 5       | 52.78       | 36.04   |
|                             | X <sub>1</sub>                | 209.1          | 1       | 209.1       | 142.8   |
|                             | X <sub>3</sub>                | 19.45          | 1       | 19.45       | 13.28   |
|                             | X <sub>1</sub> X <sub>3</sub> | 16.36          | 1       | 16.36       | 11.17   |
|                             | X <sub>1</sub> <sup>2</sup>   | 49.86          | 1       | 49.86       | 34.05   |
|                             | X <sub>3</sub> <sup>2</sup>   | 7.210          | 1       | 7.210       | 4.920   |
|                             | Residual                      | 29.29          | 21      | 1.460       | -       |
|                             | Lack of fit                   | 29.25          | 19      | 1.630       | 90.23   |
| Y <sub>2</sub> <sup>b</sup> | Model                         | 200.9          | 5       | 40.17       | 189.3   |
|                             | X <sub>2</sub>                | 139.7          | 1       | 139.7       | 658.5   |
|                             | X <sub>3</sub>                | 19.76          | 1       | 19.76       | 93.10   |
|                             | X <sub>4</sub>                | 34.48          | 1       | 34.48       | 162.5   |
|                             | X <sub>3</sub> X <sub>4</sub> | 1.780          | 1       | 1.780       | 8.370   |
|                             | X <sub>2</sub> <sup>2</sup>   | 2.540          | 1       | 2.540       | 11.98   |
|                             | Residual                      | 4.460          | 21      | 0.2100      | -       |
|                             | Lack of fit                   | 4.400          | 19      | 0.2300      | 8.710   |

<sup>a</sup> X<sub>1</sub>, Proportion of phosphoric acid in the mobile phase; X<sub>2</sub>, Flow rate; X<sub>3</sub>, Column temperature; X<sub>4</sub>, Time of gradient switch.

<sup>b</sup> Y<sub>1</sub>, Resolution between critical peaks; Y<sub>2</sub>, Retention time of the last chromatographic peak

Table S11 Validation experiment parameters and results.

| No. | Verify parameters       |                                           |                         |                         |                                | Y <sub>1</sub>        |                    | Y <sub>2</sub> (min)  |                    |
|-----|-------------------------|-------------------------------------------|-------------------------|-------------------------|--------------------------------|-----------------------|--------------------|-----------------------|--------------------|
|     | X <sub>1</sub> (%)<br>) | X <sub>2</sub><br>(mL·min <sup>-1</sup> ) | X <sub>3</sub> (°C<br>) | X <sub>4</sub><br>(min) | Probability to<br>attain goals | Experimental<br>value | Predicted<br>value | Experimental<br>value | Predicted<br>value |
| 1   | 0.1                     | 0.9                                       | 30                      | 0                       | 1                              | 1.55                  | 3.22               | 34.19                 | 34.49              |
| 2   | 0.2                     | 1                                         | 30                      | 0                       | 0.9014                         | 2.713                 | 1.55               | 33.29                 | 33.2               |
| 3   | 0.1                     | 1                                         | 35                      | 0                       | 1                              | 2.657                 | 3.42               | 32.25                 | 31.9               |

Table S12 Regression equations, correlation coefficients, and linear analysis range for each component.

| Component                          | Linear equation                  | R      | Linear range<br>( μg/mL) | Detection limit<br>( μg/mL) | Limit of<br>quantitation<br>( μg/mL) |
|------------------------------------|----------------------------------|--------|--------------------------|-----------------------------|--------------------------------------|
| Gastrodin                          | $Y=3.859 \times 10^{-5}X+1.224$  | 0.9999 | 28.64-257.8              | 0.3182                      | 1.253                                |
| <i>p</i> -hydroxybenzyl<br>alcohol | $Y=2.160 \times 10^{-5}X+0.2090$ | 0.9999 | 3.328-29.95              | 0.1726                      | 0.7488                               |
| Parishin E                         | $Y=5.828 \times 10^{-5}X+2.685$  | 0.9998 | 21.96-197.6              | 0.8133                      | 2.196                                |
| Parishin B                         | $Y=4.244 \times 10^{-5}X+2.371$  | 0.9997 | 20.26-182.3              | 0.7502                      | 2.476                                |
| Parishin C                         | $Y=4.903 \times 10^{-5}X+0.5669$ | 0.9997 | 5.040-45.36              | 0.616                       | 2.016                                |
| Parishin A                         | $Y=5.332 \times 10^{-5}X+2.692$  | 0.9999 | 56.36-507.2              | 0.6262                      | 2.087                                |

Table S13 RSD values and recovery results for intra-day precision, inter day precision, repeatability, stability.

| Component                       | Intraday precision<br>RSD (%) | Daytime precision<br>RSD (%) | Repeatability<br>RSD (%) | Stability<br>RSD (%) | Recovery rate (%) |
|---------------------------------|-------------------------------|------------------------------|--------------------------|----------------------|-------------------|
| Gastrodin                       | 1.94                          | 1.82                         | 2.42                     | 3.45                 | 98.95             |
| <i>p</i> -hydroxybenzyl alcohol | 1.25                          | 1.91                         | 2.32                     | 3.36                 | 91.35             |
| Parishin E                      | 2.40                          | 2.93                         | 3.10                     | 3.71                 | 98.48             |
| Parishin B                      | 2.19                          | 1.49                         | 3.60                     | 2.83                 | 96.98             |
| Parishin C                      | 2.21                          | 1.60                         | 3.52                     | 3.25                 | 94.26             |
| Parishin A                      | 2.04                          | 1.54                         | 2.89                     | 2.95                 | 98.24             |

Table S14 Results of content determination of GE samples from different geographical sources.

| Sample No. | Location           | W/C <sup>a</sup> | Gastrodin<br>(mg·g <sup>-1</sup> ) | <i>p</i> -hydroxybenzyl<br>alcohol(mg·g <sup>-1</sup> ) | Parishin E<br>(mg·g <sup>-1</sup> ) | Parishin B<br>(mg·g <sup>-1</sup> ) | Parishin C<br>(mg·g <sup>-1</sup> ) | Parishin A<br>(mg·g <sup>-1</sup> ) |
|------------|--------------------|------------------|------------------------------------|---------------------------------------------------------|-------------------------------------|-------------------------------------|-------------------------------------|-------------------------------------|
| 1          | Guizhou            | W                | 1.658                              | 0.5303                                                  | 5.174                               | 3.755                               | 0.8971                              | 9.725                               |
| 2          | Henan              | W                | 3.527                              | 0.9989                                                  | 4.929                               | 4.993                               | 1.615                               | 22.75                               |
| 3          | Gansu              | W                | 6.990                              | 0.9771                                                  | 8.754                               | 6.173                               | 1.628                               | 19.03                               |
| 4          | Xizang             | W                | 3.459                              | 0.7715                                                  | 7.047                               | 4.883                               | 1.684                               | 19.02                               |
| 5          | Anhui              | W                | 2.142                              | 0.9079                                                  | 3.792                               | 3.847                               | 1.366                               | 11.43                               |
| 6          | Jilin              | W                | 4.552                              | 0.7810                                                  | 9.686                               | 4.649                               | 1.173                               | 9.805                               |
| 7          | Shanxi             | W                | 4.963                              | 0.4254                                                  | 7.816                               | 3.527                               | 1.731                               | 8.833                               |
| 8          | Sichuan            | W                | 2.398                              | 0.9580                                                  | 4.222                               | 3.236                               | 0.8568                              | 5.581                               |
| 9          | Hubei              | W                | 3.064                              | 1.025                                                   | 4.356                               | 2.782                               | 0.9157                              | 5.196                               |
| 10         | Yunan              | W                | 5.397                              | 0.6469                                                  | 5.732                               | 3.667                               | 1.265                               | 10.44                               |
| 11         | Shangluo, Shanxi   | W                | 2.214                              | 0.8365                                                  | 4.786                               | 4.530                               | 1.473                               | 13.82                               |
| 12         | Dabieshan, Hubei   | W                | 5.813                              | 0.2657                                                  | 4.667                               | 1.736                               | 0.5544                              | 1.813                               |
| 13         | Lijiang, Yunnan    | W                | 1.733                              | 1.059                                                   | 10.44                               | 2.769                               | 0.5407                              | 3.099                               |
| 14         | Hanzhong, Shanxi   | W                | 1.940                              | 0.9010                                                  | 4.604                               | 3.631                               | 1.170                               | 7.340                               |
| 15         | Shiyan, Hubei      | W                | 1.827                              | 0.7581                                                  | 5.351                               | 4.108                               | 1.410                               | 10.73                               |
| 16         | Guangyuan, Sichuan | W                | 1.783                              | 0.7025                                                  | 5.323                               | 3.209                               | 1.051                               | 6.882                               |
| 17         | Nanchong, Sichuan  | W                | 1.435                              | 0.5509                                                  | 2.079                               | 1.124                               | 0.4727                              | 3.627                               |
| 18         | Yichang, Hubei     | W                | 1.095                              | 0.4191                                                  | 2.119                               | 1.700                               | 0.5577                              | 4.954                               |
| 19         | Enshi, Hubei       | W                | 2.245                              | 0.2011                                                  | 4.284                               | 1.364                               | 0.3936                              | 3.106                               |
| 20         | Ankang, Shanxi     | W                | 1.838                              | 0.1480                                                  | 1.635                               | 1.359                               | 0.3770                              | 2.175                               |



|    |                    |   |        |        |       |       |        |       |
|----|--------------------|---|--------|--------|-------|-------|--------|-------|
| 21 | Yichang, Hubei     | C | 1.082  | 0.2492 | 3.851 | 1.786 | 0.4632 | 4.817 |
| 22 | Enshi, Hubei       | C | 3.138  | 1.761  | 2.889 | 3.409 | 1.084  | 12.01 |
| 23 | Ankang, Shanxi     | C | 1.324  | 0.4143 | 3.191 | 2.218 | 0.6895 | 7.961 |
| 24 | Kangxian, Gansu    | C | 1.581  | 0.2811 | 3.088 | 2.250 | 0.7751 | 10.38 |
| 25 | Wudu, Gansu        | C | 1.069  | 0.3029 | 2.742 | 1.825 | 0.4749 | 3.39  |
| 26 | Liangshan, Sichuan | C | 0.8143 | 0.4571 | 2.304 | 1.878 | 0.4977 | 5.181 |

---

<sup>a</sup>W/C: W: wild; C: cultivated

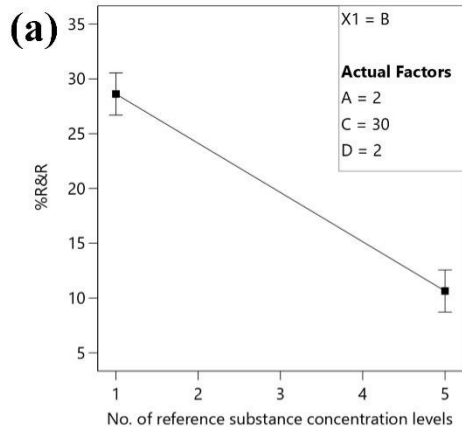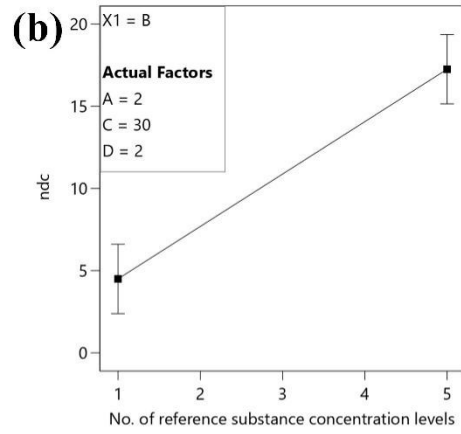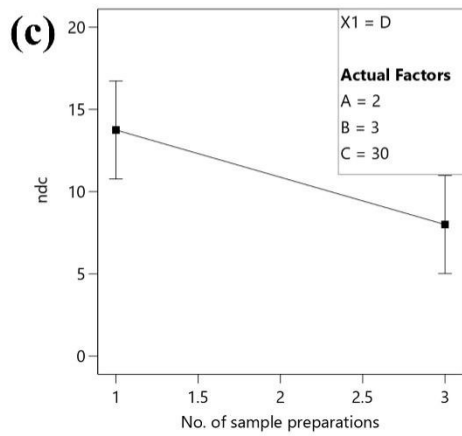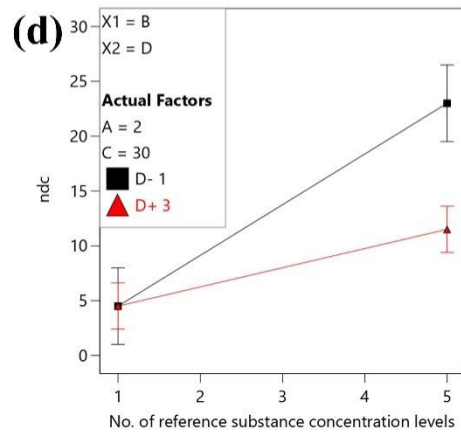

Figure S2 (a) Main effect plot for % R&R; (b)(c) Main effect plot for ndc; (d) two-factor interaction effect plots for ndc (A: No. of sample injections, B: No. of reference substance concentration levels, C: Selection method of reference substance, D: No. of sample preparations)

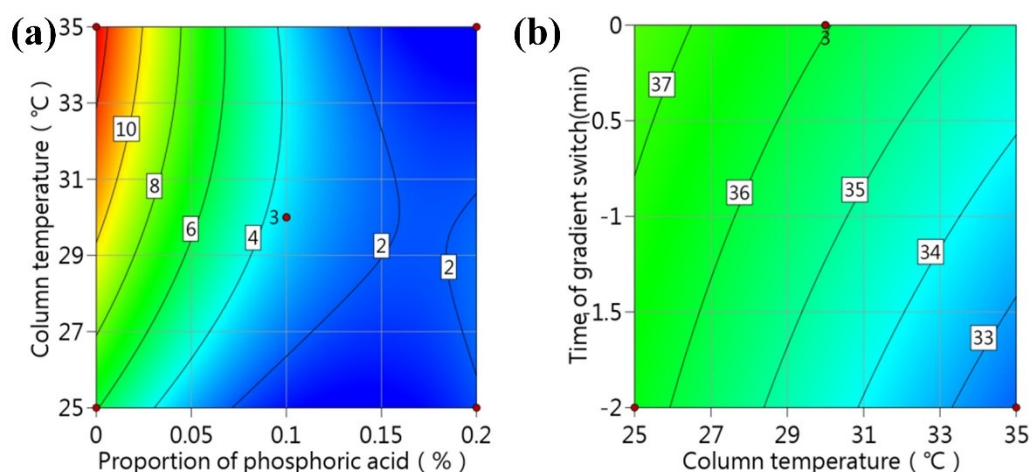

Figure S3 Contour plots showing the significant interactive effects between independent variables on responses: (a) Contour plot of the critical resolution Contour line diagram (flow rate  $0.8 \text{ mL} \cdot \text{min}^{-1}$ , gradient time change 0 min) Flow rate  $0.6 \text{ ml} \cdot \text{min}^{-1}$ ; (b) Contour line diagram of the retention time of the last chromatographic peak (phosphoric acid ratio in mobile phase 0.1%, flow rate  $0.8 \text{ mL} \cdot \text{min}^{-1}$ )

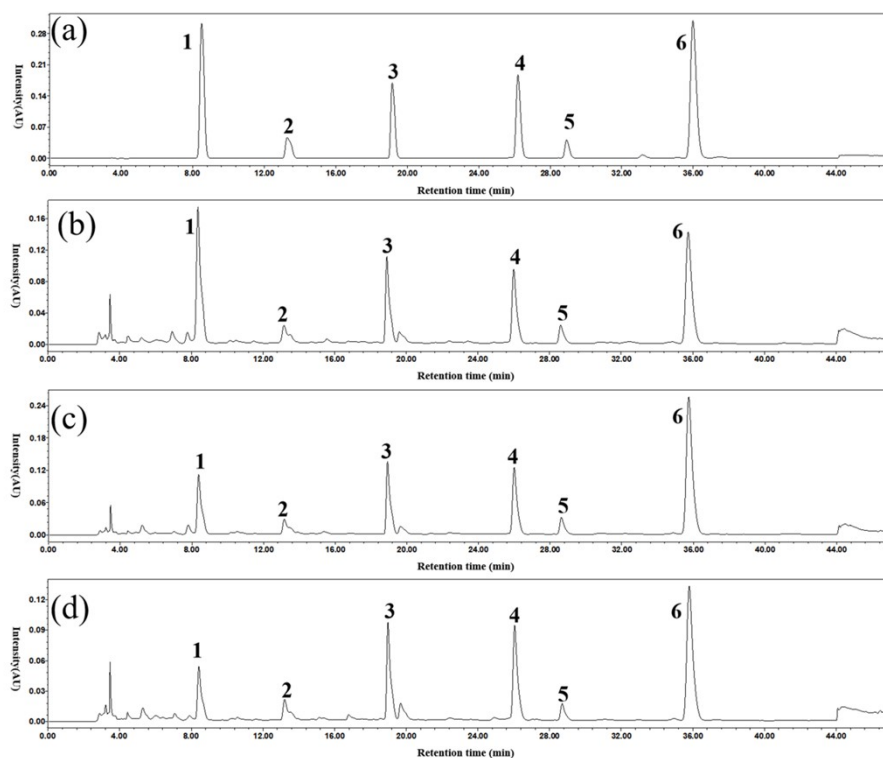

Figure S4 Typical HPLC chromatograms for standards and samples. (a) Standard solution; (b) Sample of Guizhou; (c) Sample of Gansu; (d) Sample of Xizang. Peaks 1, 2, 3, 4, 5, 6 represented Gastrodin, *p*-Hydroxybenzyl alcohol, Parisin E, Parisin B, Parisin C, Parisin A.

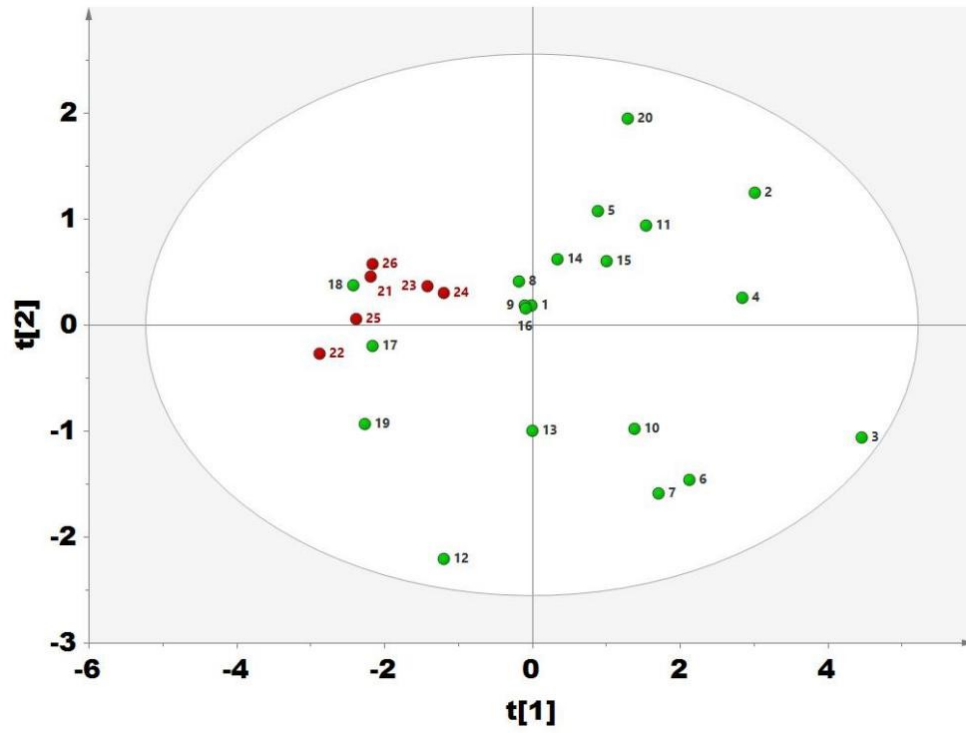

Figure S5 Score plot of PCA of the wild and cultivated *Gastrodia elata*. Green-hued points represent wild cultivated samples, those hued red represent cultivated samples.
